# Supplementary material for: How many measurements are needed to estimate accurate daily and annual soil respiration fluxes? Analysis using data from a temperate rainforest
Source: Copernicus journal article supplement (doi:10.5194/bg-2016-341), 2016-08-31
Supplement: Supplementary file 1 [file bg-2016-341-supplement.pdf]

Supplementary material

Table S1. Statistical parameters RMSE, SD and Bias (in kg CO<sub>2</sub> m<sup>-2</sup> yr<sup>-1</sup>) for the different sampling scenarios (complete day or only daytime), sampling frequency (F.P.D. frequency per day; F.P.Y. frequency per year) and approach for estimating annual R<sub>s</sub> flux (interpolation or modelling).

| Description  | Frequency |       | Interpolation |        |        | Modelling |        |        |
|--------------|-----------|-------|---------------|--------|--------|-----------|--------|--------|
|              | F.P.D     | F.P.Y | RMSE          | SD     | Bias   | RMSE      | SD     | Bias   |
| Complete day | 1         | 4     | 0.542         | 0.540  | -0.039 | 0.527     | 0.527  | 0.012  |
|              | 2         | 4     | 0.371         | 0.369  | -0.031 | 0.331     | 0.331  | 0.001  |
|              | 4         | 4     | 0.358         | 0.357  | -0.026 | 0.318     | 0.318  | -0.004 |
|              | 6         | 4     | 0.355         | 0.353  | -0.029 | 0.318     | 0.318  | 0.006  |
|              | 1         | 6     | 0.466         | 0.465  | -0.039 | 0.455     | 0.455  | -0.007 |
|              | 2         | 6     | 0.277         | 0.275  | -0.033 | 0.253     | 0.253  | -0.013 |
|              | 4         | 6     | 0.268         | 0.267  | -0.028 | 0.237     | 0.237  | -0.014 |
|              | 6         | 6     | 0.261         | 0.259  | -0.031 | 0.237     | 0.236  | -0.015 |
|              | 1         | 12    | 0.406         | 0.404  | -0.040 | 0.377     | 0.377  | -0.009 |
|              | 2         | 12    | 0.200         | 0.197  | -0.032 | 0.145     | 0.144  | -0.010 |
|              | 4         | 12    | 0.189         | 0.186  | -0.032 | 0.133     | 0.132  | -0.008 |
|              | 6         | 12    | 0.188         | 0.185  | -0.032 | 0.128     | 0.128  | -0.008 |
|              | 1         | 26    | 0.371         | 0.370  | -0.028 | 0.359     | 0.358  | -0.012 |
|              | 2         | 26    | 0.145         | 0.141  | -0.033 | 0.105     | 0.105  | -0.012 |
|              | 4         | 26    | 0.137         | 0.133  | -0.032 | 0.096     | 0.096  | -0.010 |
|              | 6         | 26    | 0.134         | 0.130  | -0.031 | 0.091     | 0.091  | -0.009 |
|              | 1         | 52    | 0.349         | 0.347  | -0.030 | 0.343     | 0.342  | -0.011 |
|              | 2         | 52    | 0.089         | 0.082  | -0.034 | 0.065     | 0.065  | -0.009 |
| 4            | 52        | 0.081 | 0.075         | -0.032 | 0.054  | 0.053     | -0.009 |        |
| 6            | 52        | 0.079 | 0.072         | -0.032 | 0.050  | 0.049     | -0.009 |        |
| Only day     | 1         | 4     | 0.534         | 0.521  | 0.118  | 0.536     | 0.513  | 0.156  |
|              | 2         | 4     | 0.396         | 0.383  | 0.102  | 0.385     | 0.359  | 0.140  |
|              | 4         | 4     | 0.376         | 0.361  | 0.106  | 0.365     | 0.333  | 0.149  |
|              | 6         | 4     | 0.376         | 0.360  | 0.107  | 0.358     | 0.329  | 0.140  |
|              | 1         | 6     | 0.465         | 0.449  | 0.119  | 0.463     | 0.441  | 0.140  |
|              | 2         | 6     | 0.318         | 0.300  | 0.107  | 0.314     | 0.288  | 0.126  |
|              | 4         | 6     | 0.296         | 0.276  | 0.106  | 0.292     | 0.262  | 0.130  |
|              | 6         | 6     | 0.295         | 0.276  | 0.106  | 0.287     | 0.255  | 0.131  |
|              | 1         | 12    | 0.403         | 0.387  | 0.112  | 0.389     | 0.365  | 0.136  |
|              | 2         | 12    | 0.248         | 0.225  | 0.106  | 0.227     | 0.181  | 0.137  |
|              | 4         | 12    | 0.226         | 0.198  | 0.108  | 0.196     | 0.142  | 0.135  |
|              | 6         | 12    | 0.220         | 0.193  | 0.107  | 0.192     | 0.137  | 0.134  |
|              | 1         | 26    | 0.368         | 0.353  | 0.102  | 0.367     | 0.339  | 0.141  |
|              | 2         | 26    | 0.198         | 0.167  | 0.107  | 0.192     | 0.140  | 0.132  |
|              | 4         | 26    | 0.167         | 0.130  | 0.105  | 0.163     | 0.098  | 0.130  |
|              | 6         | 26    | 0.167         | 0.128  | 0.107  | 0.159     | 0.089  | 0.131  |
|              | 1         | 52    | 0.351         | 0.333  | 0.112  | 0.354     | 0.327  | 0.135  |
|              | 2         | 52    | 0.167         | 0.127  | 0.108  | 0.175     | 0.117  | 0.131  |
| 4            | 52        | 0.136 | 0.084         | 0.107  | 0.147  | 0.066     | 0.131  |        |
| 6            | 52        | 0.133 | 0.077         | 0.108  | 0.142  | 0.057     | 0.130  |        |

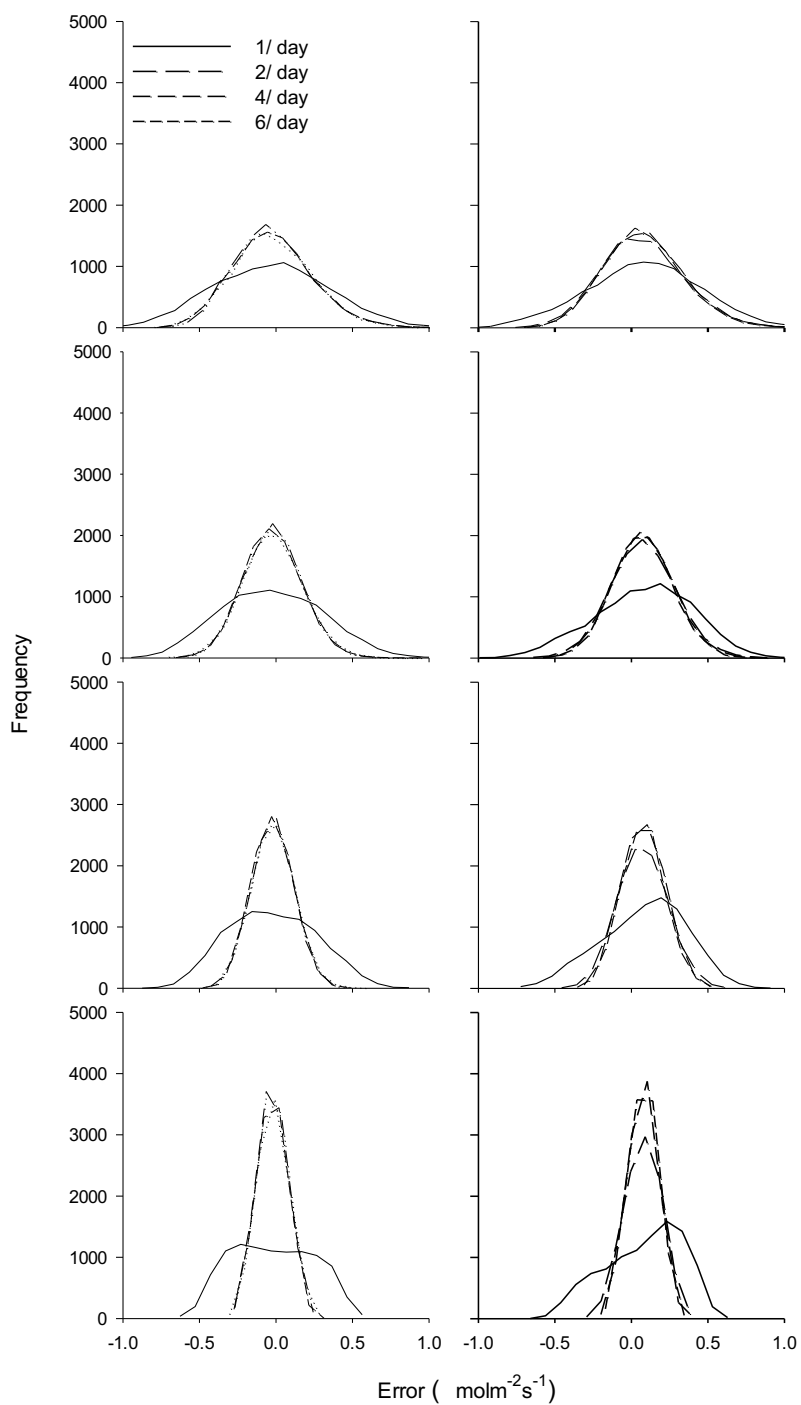

Figure S1. Histograms of the error (observed – predicted) in estimations of annual  $R_s$  using partial-data series of different sampling frequencies. Lines represent the frequencies of sampling in one day. Panels A-B are 4 measurements/year, C-D are 6/year, E-F are 12/year and G-H are 26/year. The left side panels show the day-night series and the right side panels show the daytime sampling types.
